# Supplementary material for: One-pot microwave synthesis of Pd modified titanium dioxide nanocrystals for 3D aerogel monoliths with efficient visible-light photocatalytic activity in a heated gas flow reactor
Source: Royal Society of Chemistry journal article supplement (doi:10.1039/d2ta04024g), 2022-01-01
Supplement: d2ta04024g1.pdf [file d2ta04024g1.pdf]

## Supporting Information

One-pot microwave synthesis of Pd modified titanium dioxide nanocrystals for 3D aerogel monoliths with efficient visible-light photocatalytic activity in a heated gas flow reactor

Junggou Kwon<sup>a</sup>, Kyoungjun Choi<sup>b</sup>, Elena Tervoort<sup>a</sup>, and Markus Niederberger<sup>a\*</sup>

<sup>a</sup> *Laboratory for Multifunctional Materials, Department of Materials, ETH Zurich, Vladimir-Prelog-Weg 5, 8093 Zürich, Switzerland*

<sup>b</sup> *Institute for Chemistry and Bioanalytics, School of Life Sciences, FHNW University of Applied Sciences and Arts Northwestern, Hofackerstrasse 30, 4132 Muttenz, Switzerland*

\*Email: markus.niederberger@mat.ethz.ch

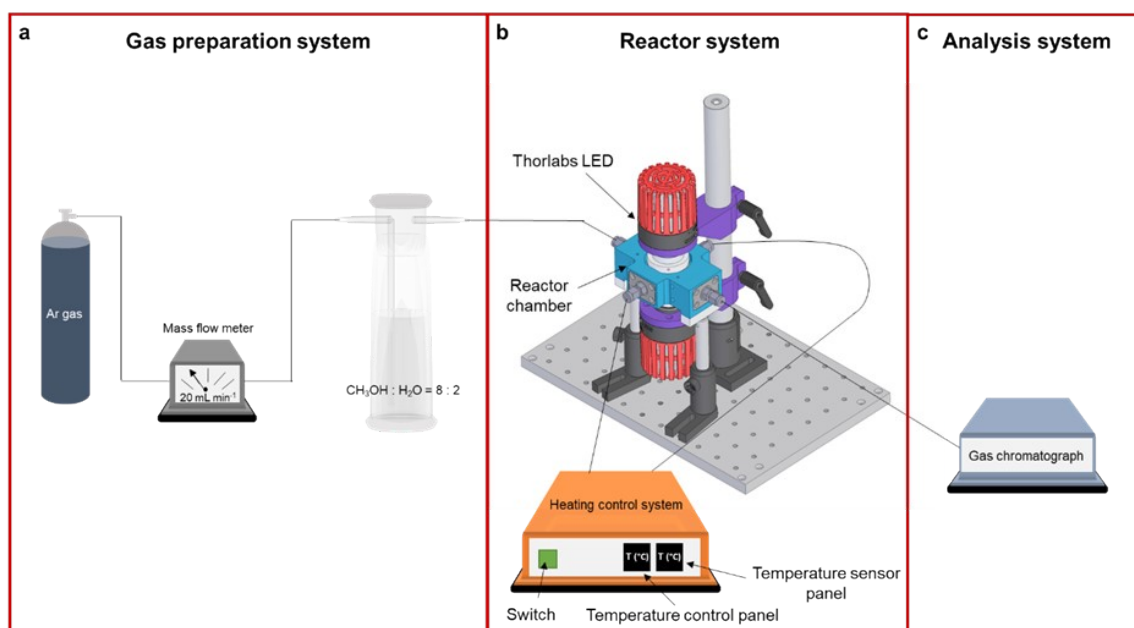

**Figure S1.**

Scheme of the complete Q-master reactor system consisting of (a) gas-preparation system with flow meter and liquid reactants, (b) reactor system with sample chamber, LEDs, and heater, and (c) analysis system composed of a gas chromatograph.

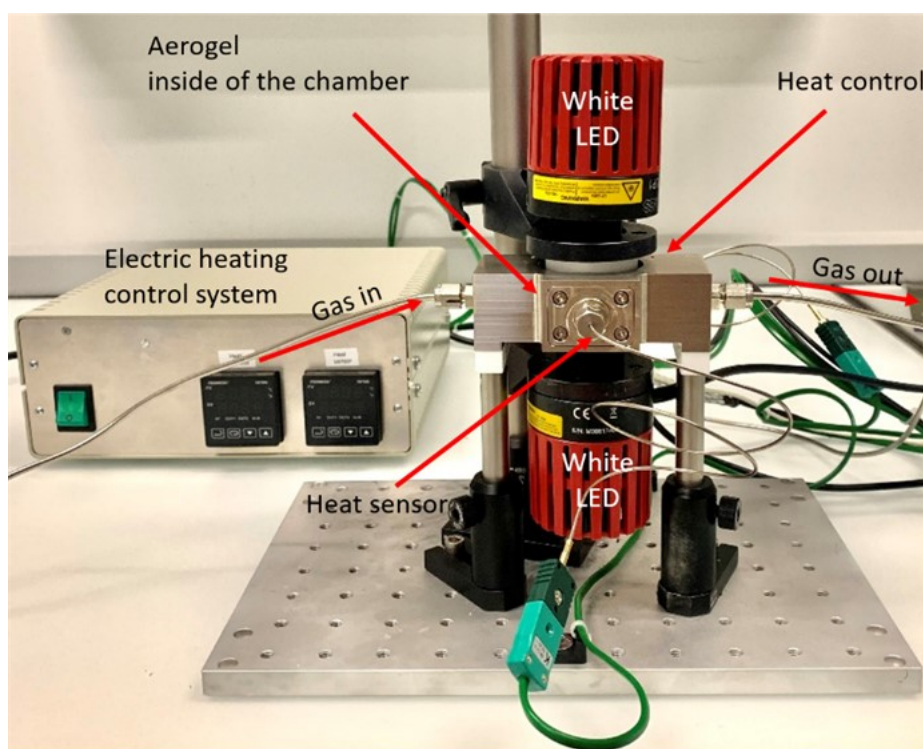

**Figure S2.** Digital photograph of the reactor system with sample chamber, LEDs, and heater.

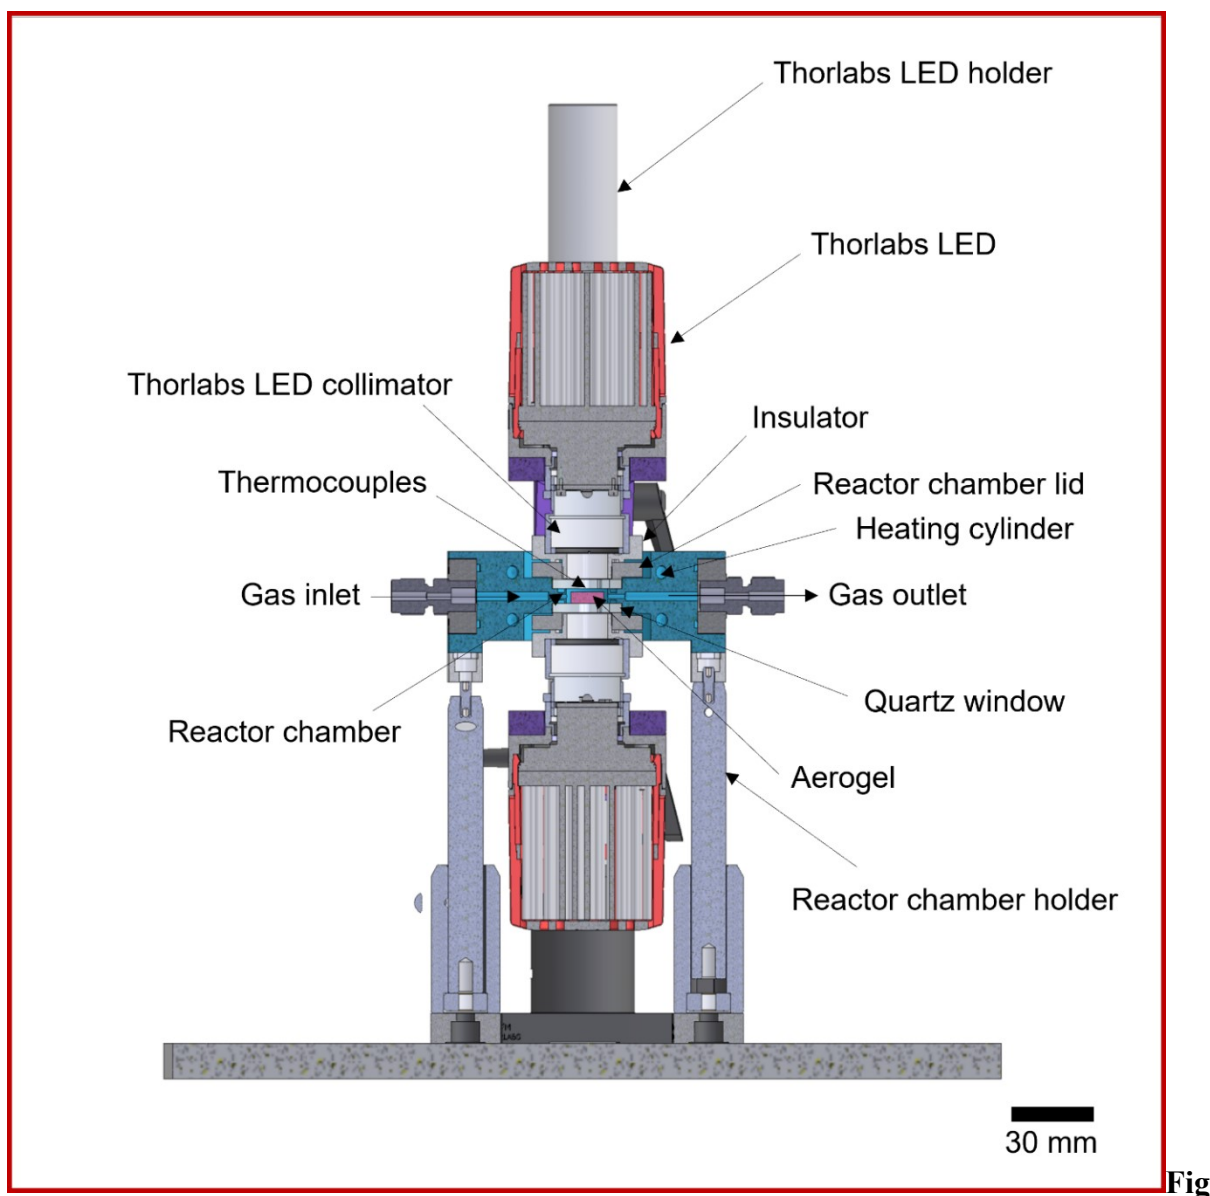

**Fig**

**ure S3.** Technical drawing of the Q-master reactor system with labeled components.

The monolithic aerogel pellet is loaded on the quartz window in the reactor chamber and oriented perpendicular to the light source (Thorlabs LEDs). The reactor chamber has a disk-like shape with a diameter of 15 mm and a height of 5 mm (total volume = 883.6 mm<sup>3</sup>). The chamber is closed by placing another quartz window and the reactor chamber lid made of stainless steel on the top. The chamber is sealed with six screws to prevent gas leakage. The gas inlet and outlet are designed to guide the gas along the cross-section of the aerogel. Four

heating cylinders made of heat-resistant chromium-nickel steel are placed inside the reactor chamber and connected to the heating control system. The temperature is measured by two thermocouples (type K). They are not shown in the image but placed near the aerogel. The first thermocouple is responsible for measuring the temperature of the gas in the chamber. The second thermocouple is for double checking the overheating of the chamber. The temperatures measured by the two thermocouples can be monitored in the temperature control panel and temperature sensor panel, respectively, in the heating control system.

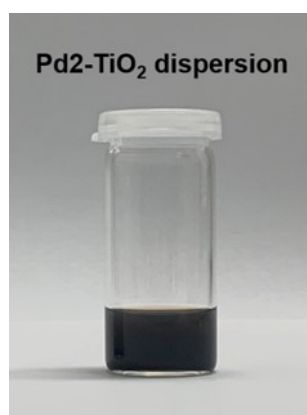

**Figure S4.** Digital photograph of Pd2-TiO<sub>2</sub> nanoparticle dispersion.

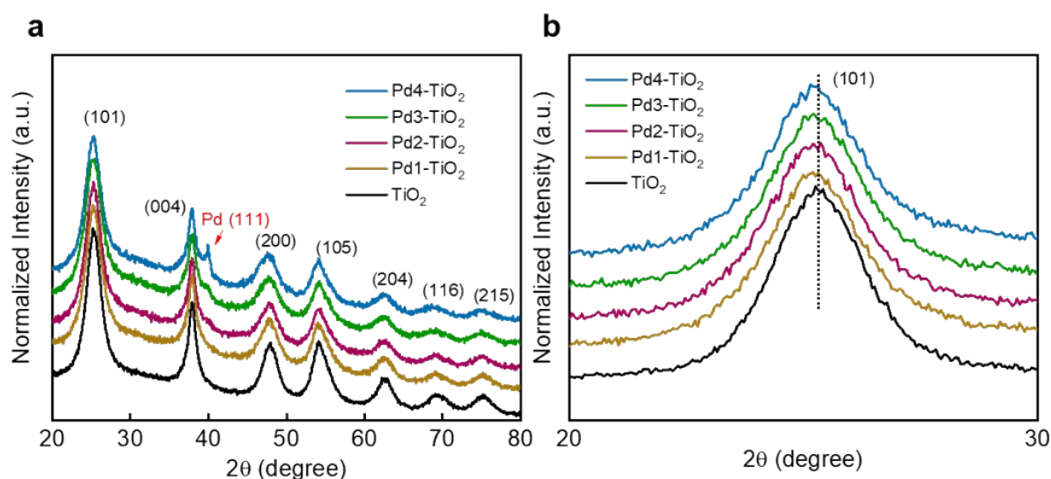

**Figure S5.** (a) XRD patterns of powdered TiO<sub>2</sub>, Pd1-TiO<sub>2</sub>, Pd2-TiO<sub>2</sub>, Pd3-TiO<sub>2</sub>, and Pd4-TiO<sub>2</sub> aerogels before annealing at 150 °C. (b) Magnification of the (101) XRD reflection of the TiO<sub>2</sub>, Pd1-TiO<sub>2</sub>, Pd2-TiO<sub>2</sub>, Pd3-TiO<sub>2</sub>, and Pd4-TiO<sub>2</sub> aerogels after annealing.

| Sample               | Crystallite size (nm) | Surface area (m <sup>2</sup> g <sup>-1</sup> ) | Pore volume (cm <sup>3</sup> g <sup>-1</sup> ) |
|----------------------|-----------------------|------------------------------------------------|------------------------------------------------|
| TiO <sub>2</sub>     | 6.9                   | 433.2                                          | 1.892                                          |
| Pd1-TiO <sub>2</sub> | 6.1                   | 422.7                                          | 1.422                                          |
| Pd2-TiO <sub>2</sub> | 5.8                   | 420.7                                          | 1.395                                          |
| Pd3-TiO <sub>2</sub> | 5.8                   | 416.5                                          | 1.352                                          |
| Pd4-TiO <sub>2</sub> | 6.2                   | 387.0                                          | 1.265                                          |

**Table S1.** Crystallite size, surface area, and pore volume of the TiO<sub>2</sub>, Pd1-TiO<sub>2</sub>, Pd2-TiO<sub>2</sub>, Pd3-TiO<sub>2</sub>, and Pd4-TiO<sub>2</sub> aerogels after annealing.

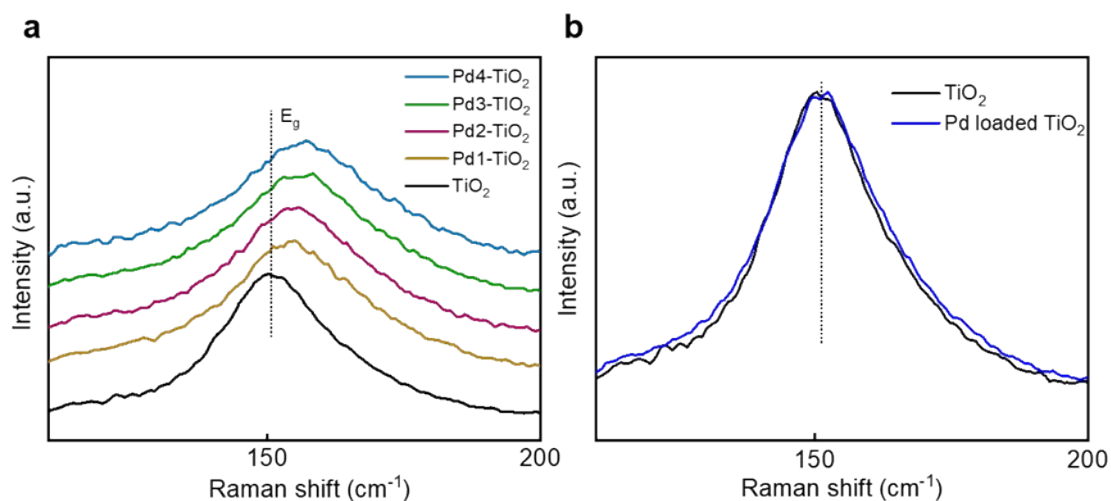

**Figure S6.** E<sub>g</sub> band in the Raman spectra of (a) TiO<sub>2</sub>, Pd1-TiO<sub>2</sub>, Pd2-TiO<sub>2</sub>, Pd3-TiO<sub>2</sub>, and Pd4-TiO<sub>2</sub> aerogels after annealing and (b) TiO<sub>2</sub> and Pd loaded TiO<sub>2</sub> aerogels after annealing.

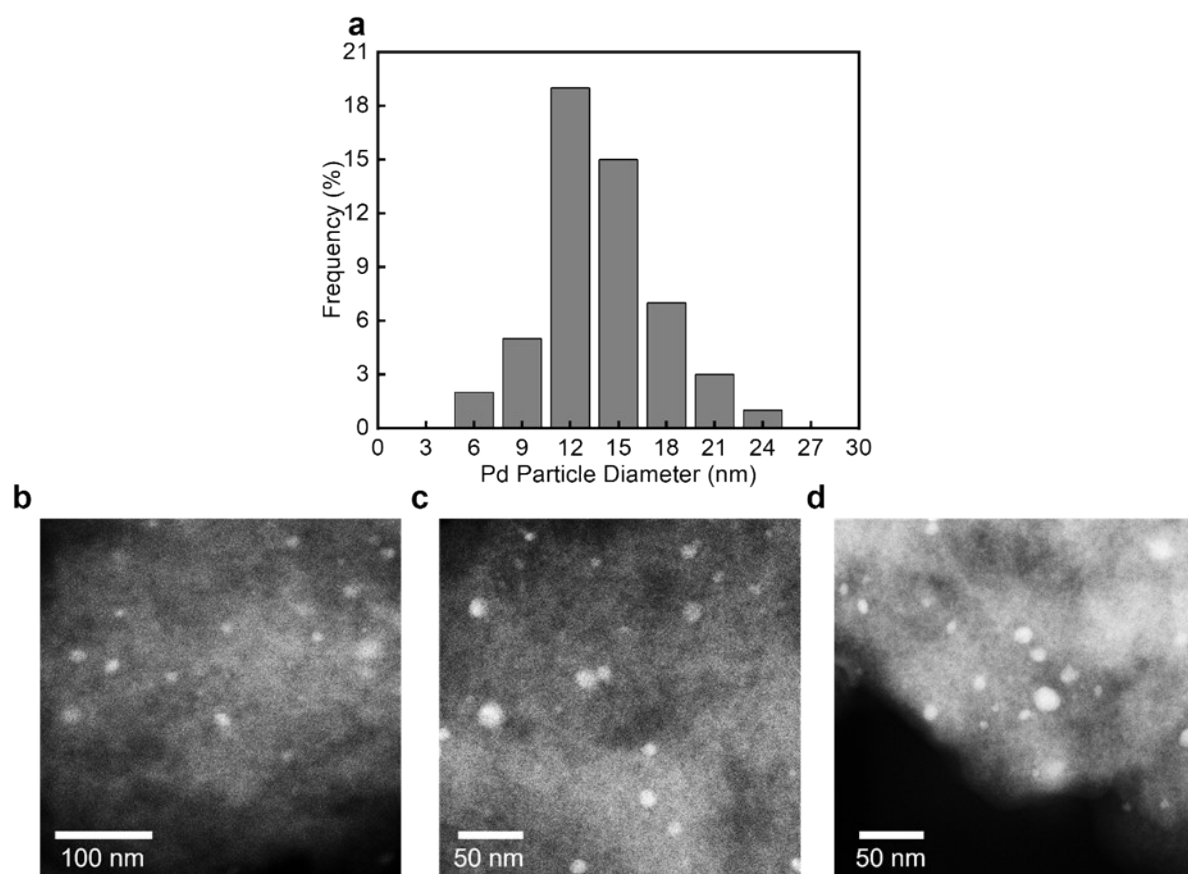

**Figure S7.** (a) Particle size distribution of the Pd nanoparticles in a Pd<sub>2</sub>-TiO<sub>2</sub> aerogel after annealing and calculated from (b-d) STEM data.

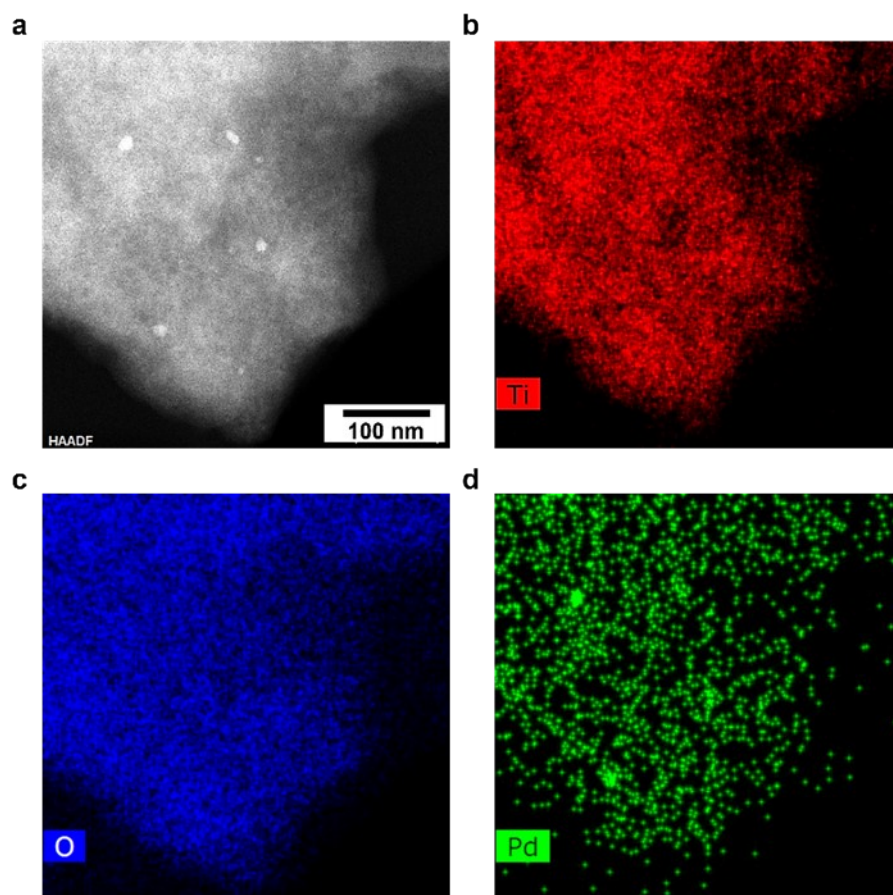

**Figure S8.** (a) HAADF-STEM image (a) of a Pd<sub>2</sub>-TiO<sub>2</sub> aerogel with the corresponding elemental maps of (b) Ti (c) O, and (d) Pd.

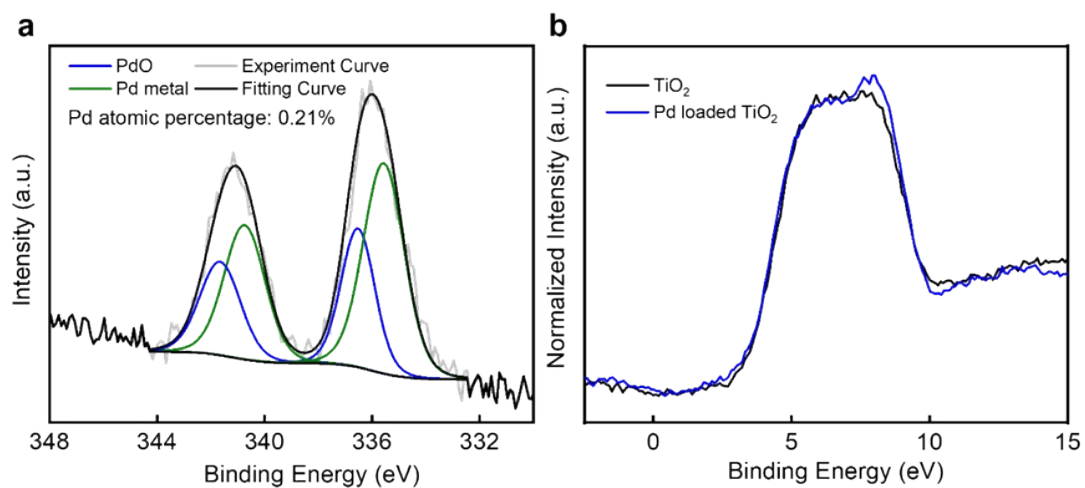

**Figure S9.** (a) XPS Pd 3d spectrum of a Pd loaded TiO<sub>2</sub> aerogel. (b) XPS valence band spectra of TiO<sub>2</sub> and Pd loaded TiO<sub>2</sub> aerogels.

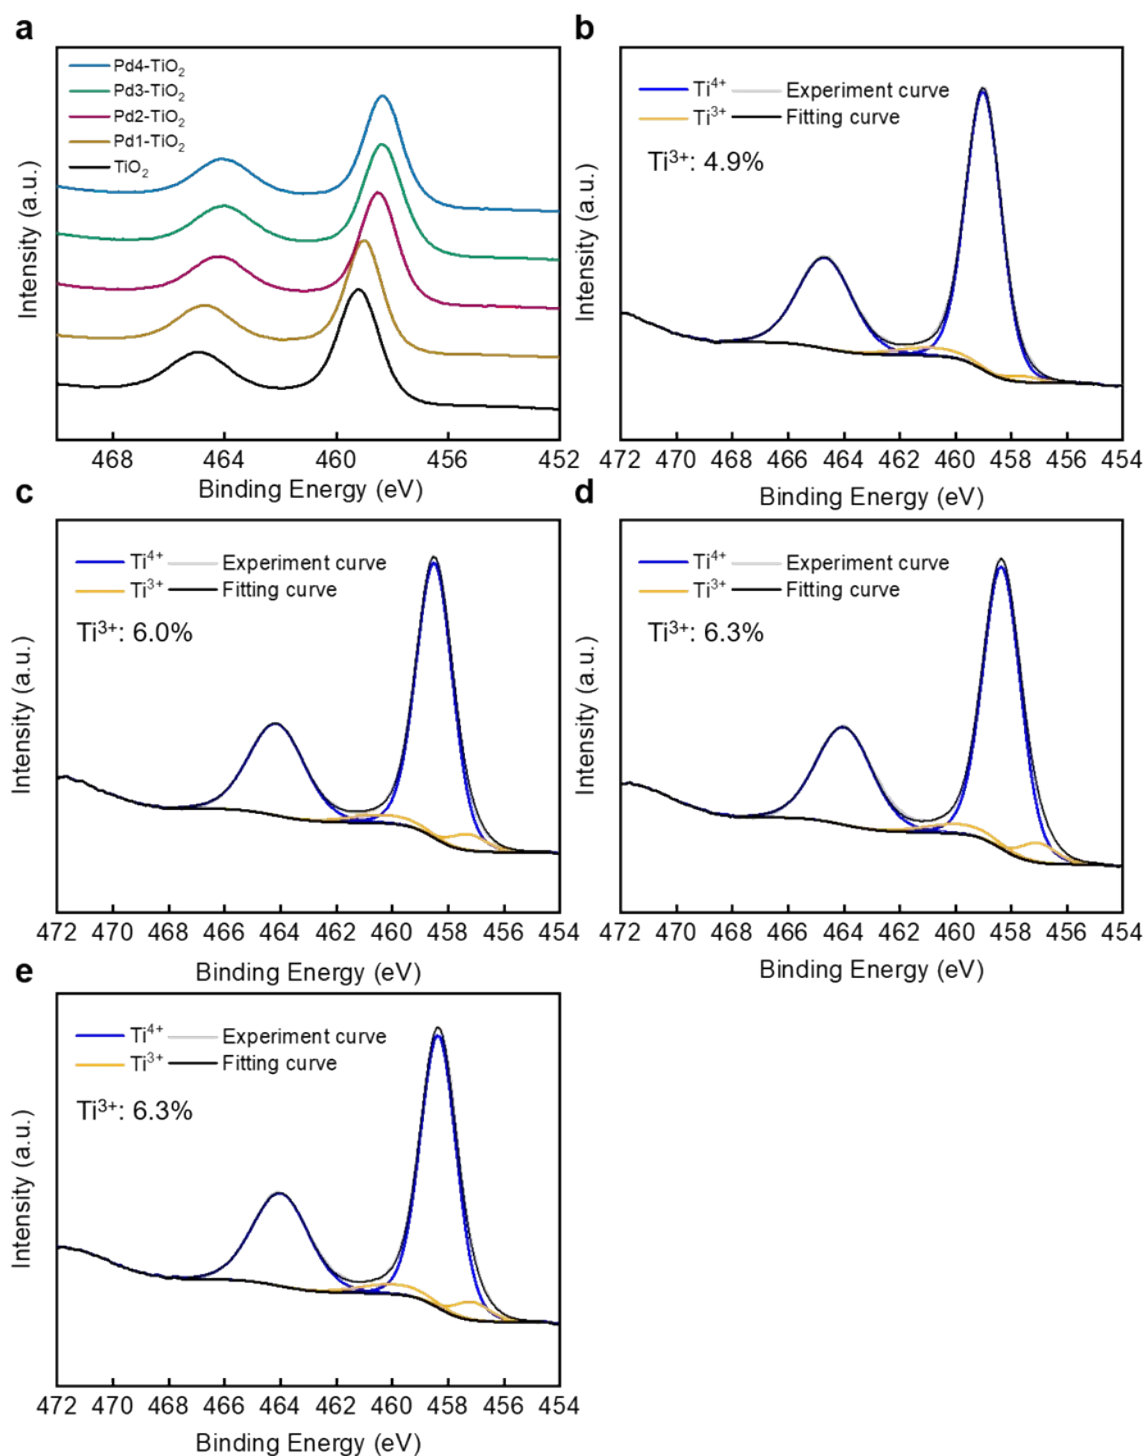

**Figure S10.** (a) XPS Ti 2p spectra of TiO<sub>2</sub>, Pd1-TiO<sub>2</sub>, Pd2-TiO<sub>2</sub>, Pd3-TiO<sub>2</sub>, and Pd4-TiO<sub>2</sub> aerogels. XPS Ti 2p spectrum of (b) Pd1-TiO<sub>2</sub>, (c) Pd2-TiO<sub>2</sub>, (d) Pd3-TiO<sub>2</sub>, and (e) Pd4-TiO<sub>2</sub> aerogels.

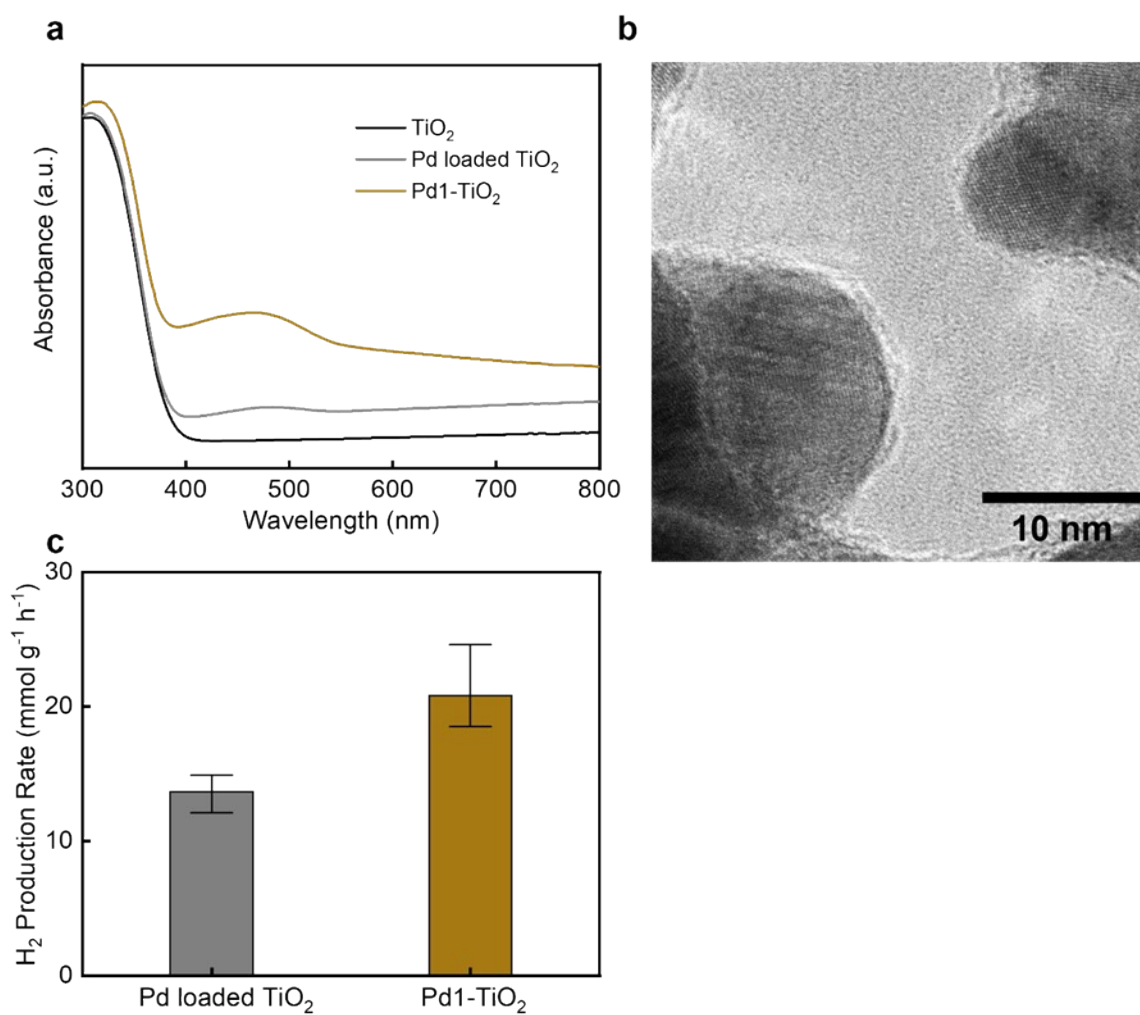

**Figure S11.** (a) UV-visible absorption spectra of  $\text{TiO}_2$ , Pd loaded  $\text{TiO}_2$ , and Pd1- $\text{TiO}_2$  aerogels. (b) HRTEM image of Pd nanoparticles used for the synthesis of a Pd loaded  $\text{TiO}_2$  aerogel. (c) Visible light-driven photocatalytic  $\text{H}_2$  production rates of Pd loaded  $\text{TiO}_2$  and Pd1- $\text{TiO}_2$  aerogels.

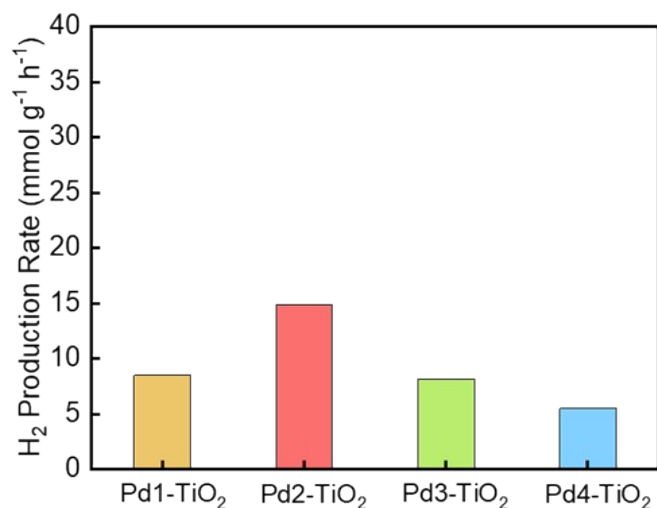

**Figure S12.** Visible light-driven photocatalytic H<sub>2</sub> production rates of Pd1-TiO<sub>2</sub>, Pd2-TiO<sub>2</sub>, Pd3-TiO<sub>2</sub>, and Pd4-TiO<sub>2</sub> aerogels using one white LED.

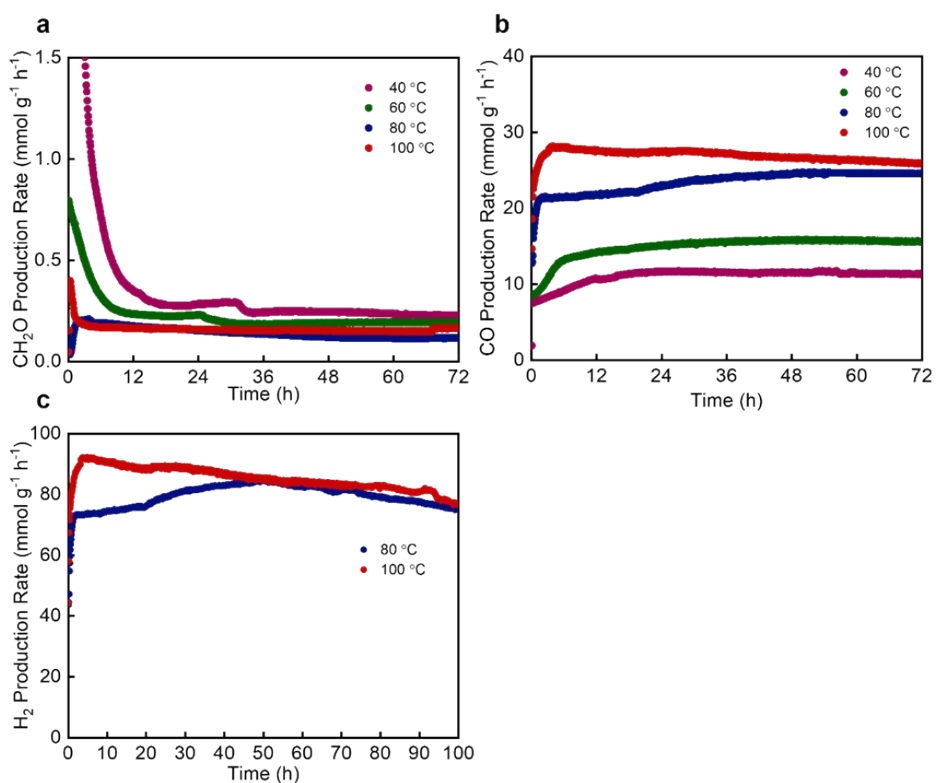

**Figure S13.** Production rates of (a) CH<sub>2</sub>O and (b) CO as CH<sub>3</sub>OH oxidation products from photocatalytic reactions using Pd2-TiO<sub>2</sub> aerogels at 40, 60, 80, and 100 °C. (c) Visible light-driven photocatalytic H<sub>2</sub> production of Pd2-TiO<sub>2</sub> aerogels at 80 and 100 °C for 100 h.

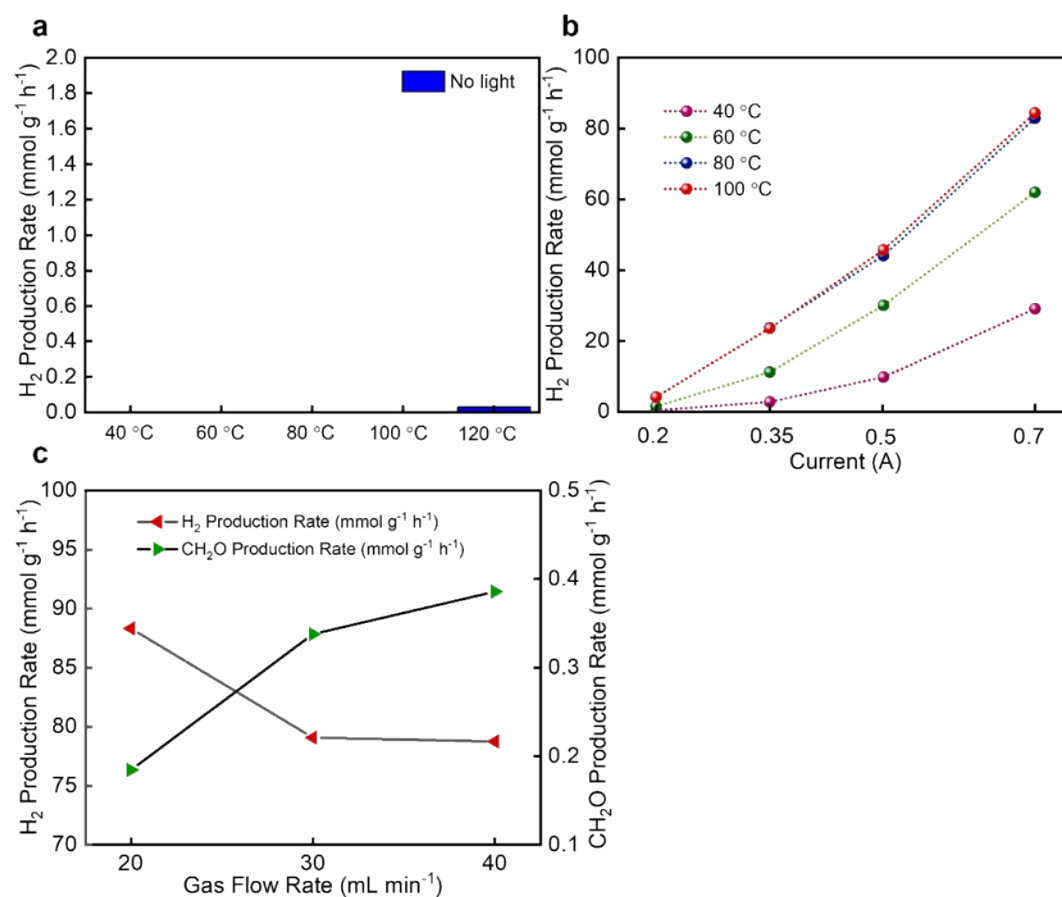

**Figure S14.** (a) H<sub>2</sub> production rates of Pd<sub>2</sub>-TiO<sub>2</sub> aerogels at 40, 60, 80, 100, and 120 °C without LED illumination. (b) Photocatalytic H<sub>2</sub> production rates obtained with different LED intensities controlled by changing the LED currents (0.2, 0.35, 0.5, and 0.7 A). (c) H<sub>2</sub> and CH<sub>2</sub>O production rates at different gas flow rates (20, 30, and 40 mL min<sup>-1</sup>) under visible light.

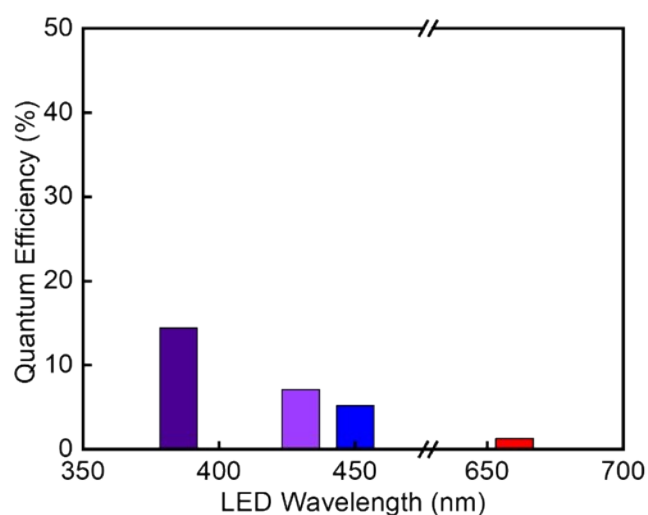

**Figure S15.** QE of Pd loaded TiO<sub>2</sub> aerogels at 100 °C under different wavelengths of LEDs.

Photocatalysts  $\rightarrow$  electron ( $e^-$ ) + holes ( $h^+$ )

$\text{CH}_3\text{OH (ad)} + h^+ \rightarrow \bullet\text{CH}_2\text{OH (ad)} + \text{H}^+ \text{ (ad)}$

$\bullet\text{CH}_2\text{OH (ad)} + h^+ \rightarrow \text{CH}_2\text{O (g)} + \text{H}^+ \text{ (ad)}$

$\text{CH}_2\text{O (ad)} + h^+ \rightarrow \bullet\text{CHO (ad)} + \text{H}^+ \text{ (ad)}$

$\bullet\text{CHO (ad)} + h^+ \rightarrow \text{CO (g)} + \text{H}^+ \text{ (ad)}$

$2\text{H}^+ \text{ (ad)} + 2e^- \rightarrow \text{H}_2 \text{ (g)}$

$\text{CO (ad)} + \text{H}_2\text{O (ad)} \rightarrow \text{CO}_2 \text{ (g)} + \text{H}_2 \text{ (g)}$

**Equation S1.** Photocatalytic CH<sub>3</sub>OH oxidation for H<sub>2</sub> production in a Pd modified TiO<sub>2</sub> aerogel.
